# Supplementary material for: The Impact of Volume Overload on the Longitudinal Change of Adipose and Lean Tissue Mass in Incident Chinese Peritoneal Dialysis Patients
Source: MDPI journal article supplement (doi:10.3390/nu14194076), 2022-09-30
Supplement: s1 [file s1]

**Table S1.** Baseline demographics, dialysis characteristics, body composition and echocardiographic parameters of incident peritoneal dialysis patients

|                                              | Patients with<br>baseline BIS<br>(n=101) | Patients with<br>baseline and<br>follow-up BIS<br>(n=68) | Patients<br>excluded after<br>baseline BIS<br>(n=33) | P-value* |
|----------------------------------------------|------------------------------------------|----------------------------------------------------------|------------------------------------------------------|----------|
| Male (%)                                     | 54 (53.5%)                               | 35 (51.5%)                                               | 19 (57.6%)                                           | 0.56     |
| Age (year)                                   | 59.4 ± 12.3                              | 60.6 ± 11.5                                              | 56.8 ± 13.6                                          | 0.18     |
| Systolic blood pressure<br>(mmHg)            | 148.6 ± 18.4                             | 147.6 ± 18<br>0                                          | 150.5 ± 19.4                                         | 0.46     |
| Diastolic blood pressure<br>(mmHg)           | 79.6 ± 11.3                              | 79.1 ± 11.2                                              | 80.7 ± 11.8                                          | 0.51     |
| BW (kg)                                      | 61.8 (53.9 to 75.6)                      | 59.6 (54.0 to 70.1)                                      | 66.5 (53.9 to<br>79.5)                               | 0.31     |
| BMI (kg/m <sup>2</sup> )                     | 23.9 (21.6 to 28.1)                      | 23.6 (21.6 to 26.9)                                      | 25.4 (21.8 to<br>30.6)                               | 0.23     |
| Causes of renal failure, no. of<br>cases (%) |                                          |                                                          |                                                      | 0.44     |
| Diabetic nephropathy                         | 55 (54.5%)                               | 36 (52.9%)                                               | 19 (57.6%)                                           |          |
| Glomerulonephritis                           | 21 (20.8%)                               | 13 (19.1%)                                               | 8 (24.2%)                                            |          |
| Hypertensive<br>nephrosclerosis              | 11 (10.9%)                               | 9 (13.2%)                                                | 2 (6.1%)                                             |          |
| Polycystic kidney                            | 5 (5.0%)                                 | 3 (4.4%)                                                 | 2 (6.1%)                                             |          |
| Comorbidities, no. of cases (%)              |                                          |                                                          |                                                      |          |
| Diabetes                                     | 60 (59.4%)                               | 40 (58.8%)                                               | 20 (60.6%)                                           | 0.86     |
| Ischemic heart disease                       | 11 (10.9%)                               | 7 (10.3%)                                                | 4 (12.1%)                                            | 0.75     |
| Congestive heart failure                     | 8 (7.9%)                                 | 5 (7.4%)                                                 | 3 (9.1%)                                             | 0.71     |
| Cerebrovascular disease                      | 7 (6.9%)                                 | 5 (7.4%)                                                 | 2 (6.1%)                                             | 1.00     |
| Charlson's Comorbidity Index                 | 5.2 ± 1.9                                | 5.2 ± 2.0                                                | 5.2 ± 1.9                                            | 0.87     |
| Laboratory parameters                        |                                          |                                                          |                                                      |          |
| Hemoglobin (g/dL)                            | 9.8 ± 1.4                                | 9.7 ± 1.4                                                | 10.0 ± 1.5                                           | 0.41     |
| Albumin (g/L)                                | 31.7 ± 4.5                               | 32.1 ± 3.7                                               | 30.7 ± 4.7                                           | 0.21     |
| Creatinine (μmol/L)                          | 792 (640 to 936)                         | 812 (674 to 935)                                         | 875 (604 to<br>944)                                  | 0.70     |
| Fasting glucose                              | 5.9 ± 3.0                                | 5.8 ± 1.6                                                | 6.1 ± 4.7                                            | 0.75     |

|                                           |                        |                        |                         |      |
|-------------------------------------------|------------------------|------------------------|-------------------------|------|
| Total cholesterol (mmol/L)                | 4.2 ± 1.2              | 4.3 ± 1.3              | 4.1 ± 1.1               | 0.46 |
| C-reactive protein (mg/L)                 | 2.0 (0.7 to 5.8)       | 1.6 (0.7 to 5.1)       | 2.6 (1.0 to 11.8)       | 0.11 |
| NT-proBNP (pg/ml)                         | 409.8 (184.8 to 857.4) | 370.6 (181.4 to 836.0) | 482.1 (192.8 to 1016.1) | 0.35 |
| Dialysis Characteristics                  |                        |                        |                         |      |
| Peritoneal glucose exposure (g/day)       | 93.5 ± 21.6            | 94.0 ± 20.4            | 92.5 ± 24.2             | 0.77 |
| APD, no. of cases (%)                     | 22 (21.8%)             | 15 (22.1%)             | 7 (21.2%)               | 0.92 |
| D/P creatinine at 4 hour                  | 0.65 ± 0.12            | 0.65 ± 0.12            | 0.66 ± 0.11             | 0.61 |
| Dialysis adequacy                         |                        |                        |                         |      |
| Weekly total Kt/V                         | 2.04 (1.63 to 2.40)    | 2.08 (1.72 to 2.52)    | 1.80 (1.44 to 2.20)     | 0.01 |
| Residual GFR (ml/min/1.73m <sup>2</sup> ) | 3.74 (1.71 to 6.55)    | 3.70 (1.77 to 7.59)    | 3.51 (1.36 to 5.84)     | 0.29 |
| Residual urine volume (L/day)             | 1.15 ± 0.73            | 1.18 ± 0.74            | 1.10 ± 0.71             | 0.65 |
| NPNA (g/kg/day)                           | 1.05 ± 0.27            | 1.06 ± 0.26            | 1.02 ± 0.30             | 0.49 |
| Echocardiographic measurements            |                        |                        |                         |      |
| EF (%)                                    | 59.5 ± 6.7             | 59.9 ± 6.5             | 58.7 ± 7.2              | 0.40 |
| E/e'                                      | 13.8 (10.9 to 18.0)    | 13.5 (10.9 to 17.3)    | 15.7 (10.5 to 19.6)     | 0.63 |
| LAVi (ml/m <sup>2</sup> )                 | 34.8 (27.9 to 43.4)    | 34.8 (28.3 to 42.6)    | 34.6 (27.0 to 45.2)     | 0.87 |
| LVEDD (mm)                                | 46.4 ± 6.5             | 46.1 ± 6.0             | 46.9 ± 7.6              | 0.59 |
| Body composition                          |                        |                        |                         |      |
| OH (liter)                                | 3.3 (1.9 to 5.4)       | 3.2 (1.8 to 5.4)       | 3.8 (2.4 to 5.5)        | 0.41 |
| RHI (%)                                   | 20.2 ± 11.1            | 20.1 ± 10.9            | 20.4 ± 11.7             | 0.91 |
| LTI (kg/m <sup>2</sup> )                  | 14.3 ± 2.8             | 14.5 ± 2.7             | 13.9 ± 3.0              | 0.33 |
| FTI (kg/m <sup>2</sup> )                  | 9.1 ± 4.8              | 8.6 ± 4.7              | 10.0 ± 5.0              | 0.17 |

\*Comparison between patients with repeated BIS to patients that were excluded

Abbreviations: APD, automated peritoneal dialysis; BIS, bioimpedance spectroscopy; BW, body weight; BMI, body mass index; D/P creatinine, ratio of dialysate to plasma concentration of creatinine; EF, ejection fraction; E/e', early trans-mitral velocity to tissue Doppler mitral annular early diastolic velocity ratio; FTI, fat tissue index; LAVi, left atrial volume index; LTI, lean tissue index; NPNA, normalized protein nitrogen appearance; NT-proBNP, N-terminal pro-brain natriuretic peptide; OH, volume of overhydration; RHI, relative hydration index

Table S2. Univariable and multivariable regress analysis to predict change in LTI and FTI from serial parameters (n=38)

|                                           | Change in LTI (kg/m <sup>2</sup> ) |         |                              |         | Change in FTI (kg/m <sup>2</sup> ) |         |                        |         |
|-------------------------------------------|------------------------------------|---------|------------------------------|---------|------------------------------------|---------|------------------------|---------|
|                                           | Univariable analysis               |         | Multivariable analysis       |         | Univariable analysis               |         | Multivariable analysis |         |
|                                           | $\beta$                            | P-value | $\beta$ (95%CI)              | P-value | $\beta$                            | P-value | $\beta$ (95% CI)       | P-value |
| Demographics                              |                                    |         |                              |         |                                    |         |                        |         |
| Age                                       | 0.18                               | 0.27    | -                            | -       | -0.18                              | 0.28    | -                      | -       |
| Male gender                               | 0.24                               | 0.15    | -                            | -       | -0.18                              | 0.29    | -                      | -       |
| CCI                                       | -0.003                             | 0.99    | -                            | -       | -0.001                             | 0.99    | -                      | -       |
| Laboratory parameters                     |                                    |         |                              |         |                                    |         |                        |         |
| Mean albumin                              | 0.23                               | 0.17    | -                            | -       | -0.09                              | 0.58    | -                      | -       |
| Mean ln(CRP)                              | -0.37                              | 0.03    | -0.27<br>(-0.43- -<br>0.11)  | 0.001   | 0.10                               | 0.56    | -                      | -       |
| Mean FBG                                  | 0.07                               | 0.65    | -                            | -       | -0.003                             | 0.99    | -                      | -       |
| Mean total cholesterol                    | -0.36                              | 0.03    | -0.18 (-<br>0.43- -<br>0.01) | 0.04    | 0.23                               | 0.18    | -                      | -       |
| Dialysis factors                          |                                    |         |                              |         |                                    |         |                        |         |
| New APD user                              | -0.06                              | 0.74    | -                            | -       | 0.12                               | 0.46    | -                      | -       |
| New icodextrin user                       | -0.26                              | 0.11    | -                            | -       | 0.23                               | 0.17    | -                      | -       |
| Time-averaged peritoneal glucose exposure | 0.01                               | 0.97    | -                            | -       | -0.03                              | 0.85    | -                      | -       |
| Time-averaged weekly total Kt/V           | -0.15                              | 0.38    | -                            | -       | 0.21                               | 0.19    | -                      | -       |

|                                     |       |         |                      |         |       |         |                      |         |
|-------------------------------------|-------|---------|----------------------|---------|-------|---------|----------------------|---------|
| Time-averaged residual urine volume | 0.19  | 0.27    | -                    | -       | -0.06 | 0.72    | -                    | -       |
| Body composition                    |       |         |                      |         |       |         |                      |         |
| Change in LTI                       | -     | -       | -                    | -       | -0.83 | <0.0001 | -0.65 (-0.72- -0.58) | <0.0001 |
| Change in FTI                       | -0.83 | <0.0001 | -0.75 (-0.92- -0.58) | <0.0001 | -     | -       | -                    | -       |
| Change in RHI                       | 0.51  | 0.001   | -                    | -       | -0.55 | <0.0001 | -0.29 (-0.38- -0.20) | <0.0001 |
| Change in BMI                       | -0.07 | 0.68    | -                    | -       | 0.53  | 0.001   | 0.52 (0.46- 0.58)    | <0.0001 |

- a. Adjusted for age, sex, mean serum albumin, mean ln(CRP), mean total cholesterol, change in RHI, change in FTI (adjusted R<sup>2</sup>= 0.781)
- b. Adjusted for age, sex, change in LTI, change in RHI, and change in BMI (adjusted R<sup>2</sup>= 0.969)

Abbreviations: APD, automated peritoneal dialysis, APD; BMI, body mass index; CAPD, continuous ambulatory peritoneal dialysis; CCI, Charlson comorbidity index; CI, confidence interval; CRP, C-reactive protein; FBG, fasting blood glucose; FTI, fat tissue index; RHI, relative hydration index
